# Supplementary material for: Behavioral Priming: It's All in the Mind, but Whose Mind?
Source: PLoS One. 2012 Jan 18;7(1):e29081. doi: 10.1371/journal.pone.0029081 (PMC3261136; doi:10.1371/journal.pone.0029081)
Supplement: Supporting Material S1 — list of stimuli. Here is the list of the primes and neutral words as well as their English translation used in both Experiment 1 and 2. (DOCX) [file pone.0029081.s001.docx]

**Supporting material S1**

| **Prime words**  **(Fr)** | **Prime words**  **(Eng)** | **Neutral words**  **(Fr)** | **Neutral words**  **(Eng)** |
| --- | --- | --- | --- |
| | Inquiet | | --- | | Vieil | | Solitaire | | Gris | | Egoïstement | | Prudente | | Sentimental | | Sages | | Têtu | | Courtois | | Isolé | | Oublieux | | Retraité | | Ridée | | Rigides | | Traditionnel | | Amère | | Conservatrice | | Tricot | | Dépendant | | Anciens | | Impuissant | | Crédule | | Précaution | | Seuls | | Canne | | Malade | | Repos | | Blanche | | Home | | | Worried | | --- | | Old | | Lonely | | Grey | | Selfishly | | Careful | | Sentimental | | Wise | | Stubborn | | Courteous | | Isolated | | Forgetful | | Retired | | Wrinkled | | Rigid | | Traditional | | Bitter | | Conservative | | Knit | | Relying | | Ancient | | Powerless | | Gullible | | Precautious | | Alone | | Cane | | Ill | | Rest | | White | | Retirement house | | | Présent | | --- | | Petit | | Affamé | | Blond | | Généreusement | | Rigoureux | | Nerveux | | Bon | | Chargé | | Ample | | Brun | | Déguisé | | Différent | | Jaune | | Connues | | Chaud | | Verte | | Empiriques | | Ricochet | | Grand | | Juristes | | Perplexe | | Occupé | | Maitrise | | Arrivés | | Statuette | | Skieurs | | Repas | | Rouge | | Bateau | | | Present | | --- | | Small | | Starved | | Blond | | Generously | | Rigorous | | Nervous | | Good | | Loaded | | Ample | | Brown | | Disguised | | Different | | Yellow | | Known | | Warm | | Green | | Empirical | | Rebound | | Tall | | Jurist | | Perplex | | Busy | | Maitrise | | Arrived | | Statuette | | Skiers | | Meal | | Red | | Boat | |
